## ***MAPT* rs242557 variant is associated with hippocampus tau uptake on <sup>18</sup>F-AV-1451 PET in non-demented elders**

Xue-Ning Shen<sup>1,2</sup>, Dan Miao<sup>2</sup>, Jie-Qiong Li<sup>2</sup>, Chen-Chen Tan<sup>2</sup>, Xi-Peng Cao<sup>3</sup>, Lan Tan<sup>2</sup>, Jin-Tai Yu<sup>1</sup>, Alzheimer's Disease Neuroimaging Initiative\*

<sup>1</sup>Department of Neurology, Huashan Hospital, Fudan University, Shanghai, China; Institute of Neurology, Fudan University, Shanghai, China

<sup>2</sup>Department of Neurology, Qingdao Municipal Hospital, Qingdao University, Qingdao, China

<sup>3</sup>Clinical Research Center, Qingdao Municipal Hospital, Qingdao University, Qingdao, China

Correspondence to: Jin-Tai Yu; email: [jintai\\_yu@fudan.edu.cn](mailto:jintai_yu@fudan.edu.cn)

Keywords: tauopathy, *MAPT*, hippocampus, <sup>18</sup>F-AV-1451 PET, non-demented, Alzheimer's disease

Received: November 5, 2018 Accepted: January 15, 2019 Published: January 30, 2019

**Copyright:** Shen et al. This is an open-access article distributed under the terms of the Creative Commons Attribution License (CC BY 3.0), which permits unrestricted use, distribution, and reproduction in any medium, provided the original author and source are credited.

### ABSTRACT

The microtubule-associated protein tau gene (*MAPT*) rs242557 variant is associated with multiple tauopathies and dementia. This study investigated whether it was correlated with brain tau-PET uptake in non-demented elders. Ninety non-demented elders were identified from the Alzheimer's Disease Neuroimaging Initiative cohort. We compared standardized uptake value ratios (SUVs) of tau-PET tracer <sup>18</sup>F-AV-1451 between rs242557 variant carriers and non-carriers in 25 regions of interest (ROIs). The minor allele A was associated with increased hippocampus <sup>18</sup>F-AV-1451 uptake in non-demented elders (left:  $\beta = 0.111$ , Bonferroni corrected  $p = 0.035$ ; right:  $\beta = 0.103$ , Bonferroni corrected  $p = 0.031$ ). A $\beta$ -positive participants (left:  $\beta = 0.206$ , Bonferroni corrected  $p = 0.029$ ; right:  $\beta = 0.198$ , Bonferroni corrected  $p = 0.035$ ) and *APOE*  $\epsilon 4$  non-carriers (left:  $\beta = 0.140$ , Bonferroni corrected  $p = 0.006$ ; right:  $\beta = 0.134$ , Bonferroni corrected  $p = 0.004$ ) exhibited approximately the same findings in hippocampus. Considering no obvious associations in other regions, we confirmed the significant correlation of *MAPT* rs242557 risk variant with increased hippocampus tau deposition in non-demented elders. With higher magnitude signals in the hippocampus that is more likely to be uniquely affected in AD, the tau PET ligand <sup>18</sup>F-AV-1451 seemed to possess a specific binding property for AD-like tau pathology.

### INTRODUCTION

Variations in the microtubule-associated protein tau gene (*MAPT*) which encodes tau protein for microtubule stability and signal transduction, are well docu-

mented to be involved in typical tauopathies and dementia [1]. The H1 haplotype has been reported to be a primary factor for the associations of *MAPT* with Alzheimer's disease (AD), progressive supranuclear palsy (PSP), corticobasal degeneration (CBD) and pathological tau aggregates in cognitively normal elderly [1–3]. Tagging the six-locus sub-haplotype H1c that was predominantly linked to these pathologies, single nucleotide polymorphism (SNP) rs242557 located in a regulatory region interfering with *MAPT* expression [4, 5]. Strong associations have been found of the locus rs242557 with plasma and cerebrospinal fluid (CSF) tau levels [6, 7], but there is a lack of research on the possible correlation between neuro-

\*Data used in preparation of this article were obtained from the Alzheimer's Disease Neuroimaging Initiative (ADNI) database ([adni.loni.usc.edu](http://adni.loni.usc.edu)). As such, the investigators within the ADNI contributed to the design and implementation of ADNI and/or provided data but did not participate in analysis or writing of this report. A complete listing of ADNI investigators can be found at: [http://adni.loni.usc.edu/wpcontent/uploads/how\\_to\\_apply/ADNI\\_Acknowledgement\\_List.pdf](http://adni.loni.usc.edu/wpcontent/uploads/how_to_apply/ADNI_Acknowledgement_List.pdf)

imaging of pathological tau deposits and rs242557 variant. The advent of  $^{18}\text{F}$ -AV-1451 tracer, a ligand of tau positron emission tomography (PET), has given genetic research the privilege of accurate visualizing the focal distribution and regional propagation of tau pathology in living human brains [8]. Previous studies have demonstrated increased temporal  $^{18}\text{F}$ -AV-1451 retentions in symptomatic individuals harboring *MAPT* mutations, including R406W and V337M [9, 10]. Researchers have also explored the distinct patterns of  $^{18}\text{F}$ -AV-1451 binding in relation to clinical variants of AD and other tauopathy [11, 12]. However, it remains insufficient using tau PET to map whether the distribution of brain tau deposition was correlated with *MAPT* rs242557 variant. To test this, we compared the  $^{18}\text{F}$ -AV-1451 binding between rs242557 variant carriers and non-carriers in a cohort of non-demented elders.

## RESULTS

### Participants

A total of 90 non-demented elders (mean age:  $71.39 \pm 6.45$  years, 62.2% women and mean MMSE score:  $28.36 \pm 2.02$ ) were enrolled in the study to evaluate the correlation between *MAPT* rs242557 variant and tau-PET  $^{18}\text{F}$ -AV-1451 uptake in the brain. Demographic characteristics and clinical features of the cohort and subgroups were listed in Table 1. This non-demented cohort was composed of 41 cognitively healthy controls and 49 individuals with mild cognitive impairment (MCI). As expected, the MCI individuals showed worse performance on neuropsychological tests than the normal controls ( $p < 0.005$ ). We did not find any differences between this two groups in age, gender proportion, years of education and *APOE*  $\epsilon 4$  carriage ( $p > 0.05$ ). While in the subgroup analyses, the A $\beta$ -positive group in comparison to the A $\beta$ -negative group was older ( $73.03 \pm 7.01$  vs.  $69.91 \pm 5.48$  years,  $p < 0.05$ ), presenting with a larger proportion of *APOE*  $\epsilon 4$  carriage (45.7% vs. 20.7%,  $p < 0.05$ ) and worse MMSE scores ( $27.91 \pm 1.84$  vs.  $28.63 \pm 2.10$ ,  $p < 0.05$ ). There were no significant differences in demographic characteristics and clinical features between the *APOE*  $\epsilon 4$  carriers and the non-carriers ( $p > 0.05$ ).

### Correlations in the whole cohort

Quantitative assessments showed an elevated hippocampus tau-PET SUVR level in subjects carrying rs242557 risk variant (MAF: A=0.4024) compared to the non-carriers in the nondemented cohort (Figure 1A, 1B)). The nonparametric Kruskal-Wallis test suggested that there were rs242557 variant group differences in several brain regions of interest (ROIs) (left/right hippocampus, left entorhinal cortex, left/right parahippocampus,

left/right superior temporal cortex, left/right inferior temporal cortex, right lateral occipital cortex, right inferior parietal cortex and left superior frontal cortex,  $p < 0.05$ ; see Supplementary Table 2). However, the linear regression analyses illustrated that there remained only significant correlations between *MAPT* rs242557 risk variant and elevated hippocampus uptake of  $^{18}\text{F}$ -AV-1451, whether in the model unadjusted (left:  $\beta = 0.128$ ,  $p < 0.001$ , Bonferroni corrected  $p = 0.006$  and right:  $\beta = 0.120$ ,  $p < 0.001$ , Bonferroni corrected  $p = 0.004$ ) and adjusted (left:  $\beta = 0.111$ ,  $p = 0.001$ , Bonferroni corrected  $p = 0.035$  and right:  $\beta = 0.103$ ,  $p = 0.001$ , Bonferroni corrected  $p = 0.031$ ) for age, gender, education, *APOE*  $\epsilon 4$  carriage and diagnosis. Analyses of other brain ROIs did not show any significant results (Supplementary Table 1). In addition, we did not observe any group differences among genotypes or statistically significant associations of CSF t-tau and p-tau (Supplementary Tables 1–3).

### Correlations in subgroups categorized by diagnosis

Tau PET signal  $^{18}\text{F}$ -AV-1451 were statistically different among the 3 genotypes in the left/right hippocampus, left entorhinal cortex, right caudate and left/right superior temporal cortex of the MCI group ( $p < 0.05$ ) and left parahippocampus of the control group ( $p < 0.05$ ) (Supplementary Table 2). While in the unadjusted linear regression model, only the left/right hippocampus of the MCI group presented a correlation with higher  $^{18}\text{F}$ -AV-1451 retention (left:  $\beta = 0.164$ ,  $p = 0.002$ , Bonferroni corrected  $p = 0.049$  and right:  $\beta = 0.163$ ,  $p = 0.001$ , Bonferroni corrected  $p = 0.018$ ), which failed to reduplicate in further analysis adjusted for age, gender, education and *APOE*  $\epsilon 4$  carriage (left:  $\beta = 0.131$ ,  $p = 0.004$ , Bonferroni corrected  $p = 0.103$  and right:  $\beta = 0.133$ ,  $p = 0.002$ , Bonferroni corrected  $p = 0.051$ ) (Supplementary Table 3).

### Correlations in subgroups categorized by A $\beta$ pathology

Tau-PET SUVRs were greater in several brain regions of subjects carrying the rs242557 allele A than those of non-carriers (left/right hippocampus, left entorhinal cortex, right parahippocampus, right caudate, right superior temporal cortex of the A $\beta$ -positive group and left entorhinal cortex, left parahippocampus, left superior temporal cortex of the A $\beta$ -negative group,  $p < 0.05$ ) (Supplementary Table 2). In the A $\beta$ -positive group, we observed evidently higher hippocampus  $^{18}\text{F}$ -AV-1451 retention in rs242557 allele A carriers compared with the non-carriers (unadjusted model: left:  $\beta = 0.214$ ,  $p = 0.001$ , Bonferroni corrected  $p = 0.036$  and right:  $\beta = 0.211$ ,  $p < 0.001$ , Bonferroni corrected  $p = 0.011$ ; adjusted model: left:  $\beta = 0.206$ ,  $p = 0.001$ , Bonferroni corrected  $p = 0.029$  and right:  $\beta = 0.198$ ,  $p = 0.001$ , Bonferroni corrected  $p = 0.035$ ; Figure 2A, 2B),

**Table 1. Demographic and clinical characteristics of the studying cohort.**

|                                       | Non-demented elders | MCI              | CN                            | A $\beta$ -positive participants | A $\beta$ -negative participants | <i>APOE</i> $\epsilon$ 4 carriers | <i>APOE</i> $\epsilon$ 4 non-carriers |
|---------------------------------------|---------------------|------------------|-------------------------------|----------------------------------|----------------------------------|-----------------------------------|---------------------------------------|
| n                                     | 90                  | 49               | 41                            | 35                               | 53                               | 29                                | 61                                    |
| Age (years)                           | 71.39 $\pm$ 6.45    | 70.60 $\pm$ 6.84 | 72.34 $\pm$ 6.00              | 73.03 $\pm$ 7.01                 | 69.91 $\pm$ 5.48 <sup>b</sup>    | 70.13 $\pm$ 6.89                  | 71.99 $\pm$ 6.14                      |
| Gender (Male/Female)                  | 34/56               | 33/16            | 23/18                         | 14/21                            | 20/33                            | 10/19                             | 24/37                                 |
| Education (years)                     | 16.39 $\pm$ 2.73    | 16.06 $\pm$ 3.14 | 16.78 $\pm$ 2.16              | 16.40 $\pm$ 2.75                 | 16.40 $\pm$ 2.77                 | 16.38 $\pm$ 3.02                  | 16.39 $\pm$ 2.58                      |
| Diagnosis (MCI/CN)                    | 49/41               | —                | —                             | 22/13                            | 26/27                            | 18/11                             | 31/30                                 |
| Genotype (GG/AG/AA)                   | 44/31/15            | 25/17/7          | 19/14/8                       | 16/15/4                          | 28/15/10                         | 13/11/5                           | 31/20/10                              |
| <i>APOE</i> $\epsilon$ 4 carriage (%) | 32.2                | 36.7             | 26.8                          | 45.7                             | 20.8                             | —                                 | —                                     |
| Neuropsychological tests              |                     |                  |                               |                                  |                                  |                                   |                                       |
| MMSE                                  | 28.36 $\pm$ 2.02    | 27.77 $\pm$ 2.32 | 29.05 $\pm$ 1.36 <sup>a</sup> | 27.91 $\pm$ 1.84                 | 28.63 $\pm$ 2.10 <sup>b</sup>    | 27.93 $\pm$ 2.18                  | 28.57 $\pm$ 1.90                      |
| CDR-SB                                | 0.81 $\pm$ 1.34     | 1.39 $\pm$ 1.57  | 0.09 $\pm$ 0.30 <sup>a</sup>  | 1.21 $\pm$ 1.72                  | 0.58 $\pm$ 0.97                  | 1.05 $\pm$ 1.68                   | 0.69 $\pm$ 1.11                       |
| ADAS-cog11                            | 7.19 $\pm$ 4.08     | 8.79 $\pm$ 4.53  | 5.32 $\pm$ 2.50 <sup>a</sup>  | 8.09 $\pm$ 4.70                  | 6.52 $\pm$ 3.39                  | 7.34 $\pm$ 4.59                   | 7.12 $\pm$ 3.81                       |
| ADAS-cog13                            | 11.36 $\pm$ 6.41    | 14.21 $\pm$ 6.87 | 8.10 $\pm$ 3.94 <sup>a</sup>  | 12.66 $\pm$ 7.34                 | 10.37 $\pm$ 5.62                 | 11.79 $\pm$ 7.30                  | 11.15 $\pm$ 6.03                      |

Data are presented as mean  $\pm$  SD; differences in characteristics between sub-groups were assessed using Chi-square test or Wilcoxon rank test.

Note: Two subjects lack of CSF and PET A $\beta$  data were excluded in the analyses grouped by presence or absence of abnormal A $\beta$  deposition.

A $\beta$  = amyloid-beta; APOE = Apolipoprotein E; MCI = mild cognitive impairment; CN = control.

<sup>a</sup>MCI versus CN,  $p < 0.05$ .

yet this relevance presented unsubstantiated in the A $\beta$ -negative group (unadjusted model: left:  $\beta = 0.091$ ,  $p = 0.014$ , Bonferroni corrected  $p = 0.355$  and right:  $\beta = 0.083$ ,  $p = 0.015$ , Bonferroni corrected  $p = 0.365$ ; adjusted model: left:  $\beta = 0.083$ ,  $p = 0.035$ , Bonferroni corrected  $p = 0.878$  and right:  $\beta = 0.075$ ,  $p = 0.037$ , Bonferroni corrected  $p = 0.930$ ; Figure 2C, 2D).

### Correlations in subgroups categorized by *APOE* $\epsilon$ 4 carriage

In the *APOE*  $\epsilon$ 4 carriers, we did not find significant group differences in any brain ROIs (Supplementary Table 2). While, there were statistical group differences observed in several ROIs of the *APOE*  $\epsilon$ 4 non-carriers (left/right hippocampus, left entorhinal cortex, left/right parahippocampus, left thalamus, brainstem, left/right superior temporal cortex, left inferior temporal cortex and right superior frontal cortex) (Supplementary Table 2). Further in the more reliable regression analyses, a

significant correlation of rs242557 risk variant with increased hippocampus tau-PET <sup>18</sup>F-AV-1451 uptake has been illustrated in the subgroup of *APOE*  $\epsilon$ 4 non-carriers (unadjusted model: left:  $\beta = 0.148$ ,  $p < 0.001$ , Bonferroni corrected  $p = 0.002$  and right:  $\beta = 0.144$ ,  $p < 0.001$ , Bonferroni corrected  $p = 0.001$ ; adjusted model: left:  $\beta = 0.140$ ,  $p < 0.001$ , Bonferroni corrected  $p = 0.006$  and right:  $\beta = 0.134$ ,  $p < 0.001$ , Bonferroni corrected  $p = 0.004$ ; Figure 3A, 3B). However, no positive findings were detected in the regression analyses of the *APOE*  $\epsilon$ 4 carriers (Figure 3C, 3D).

## DISCUSSION

In the present study, we identified a significant correlation between *MAPT* rs242557 risk variant and increased hippocampus uptake of tau-PET tracer <sup>18</sup>F-AV-1451 in the non-demented elders, especially in those with abnormal A $\beta$  deposition. Subjects harboring rs242557 allele A exhibited higher tau PET SUVR

levels than those carrying the allele G, implying that rs242557 served as a functional locus whose minor allele A could promote the expression of tau aggregates in the hippocampus. The widely used tau-PET tracer  $^{18}\text{F}$ -AV-1451 was developed for binding to the AD-type tau pathology [13]. Recently, a case-control tau-PET study has demonstrated elevated temporal  $^{18}\text{F}$ -AV-1451 binding in participants with *MAPT* mutations outside exon 10, who were supposed to have 3 repeated (3R-tau) and 4 repeated tau (4R-tau) isoforms mixtures [10]. Since tau aggregates in AD are paired helical filaments (PHF) composed of mixed 3R/4R tau aggregates [14], they therefore supported the notion that  $^{18}\text{F}$ -AV-1451 has the specific binding capacity for AD-like tau pathology [10]. Our sample of subjects showed higher-magnitude tau-PET  $^{18}\text{F}$ -AV-1451 signal in the hippocampus rather than other brain ROIs that could be influenced by other non-AD tau pathology. Based on these, it is reasonable to speculate that the ligand  $^{18}\text{F}$ -AV-1451 may possess a unique binding property for AD-like tau pathology. However, pathophysiologic and longitudinal tau-PET  $^{18}\text{F}$ -AV-1451 studies would be necessary to investigate whether and how this ligand tracks along with neurodegeneration.

This study added evidence to the correlation of *MAPT* rs242557 variant with tau pathology and helped reconcile some discrepancies concerning the role of rs242557 variant in AD. Previously, Laws et al. have detected an association between rs242557 minor allele

A and elevated cerebrospinal fluid (CSF) total tau (t-tau) levels in a quantitative trait analysis [7]. A genome-wide significant association has also been identified of rs242557 allele A with higher plasma t-tau concentrations [6]. While in a recent meta-analysis of 12 studies, no significant correlations were observed between rs242557 and AD [15]. Authors suggested that the protective impact of rs242557 allele A on risk of AD in the Asian population seemed unreliable and needed further verification eliminating potential influence caused by ethnicity [15]. Our current study limited the ethnicity of included subjects and hence the results were reliable. In addition, it is also illustrated in a subset of amnesic MCI patients with selective medial temporal hypometabolism that absent or low amyloid-PET signal together with CSF  $\beta$ -amyloid (1–42) protein finding did not show expected typical pattern of AD [16]. In another study, patients with R406W mutation exhibited predominant  $^{18}\text{F}$ -AV-1451 uptake in hippocampus and temporal regions, correlating with glucose hypometabolism and negative amyloid-PET [9]. These provide clues to utilizing the  $^{18}\text{F}$ -AV-1451 PET for accurately quantifying the regional distribution of pathological tau aggregates [9]. Furthermore, the link between rs242557 variant and significantly increased hippocampus  $^{18}\text{F}$ -AV-1451 retention was more obvious with the presence of abnormal brain amyloidosis, which may be explained by the possible effect of  $\text{A}\beta$  pathology as an early pathological change of AD on tau pathology. Besides, we did not find consolidated evidence for correlations in the subgroup analyses

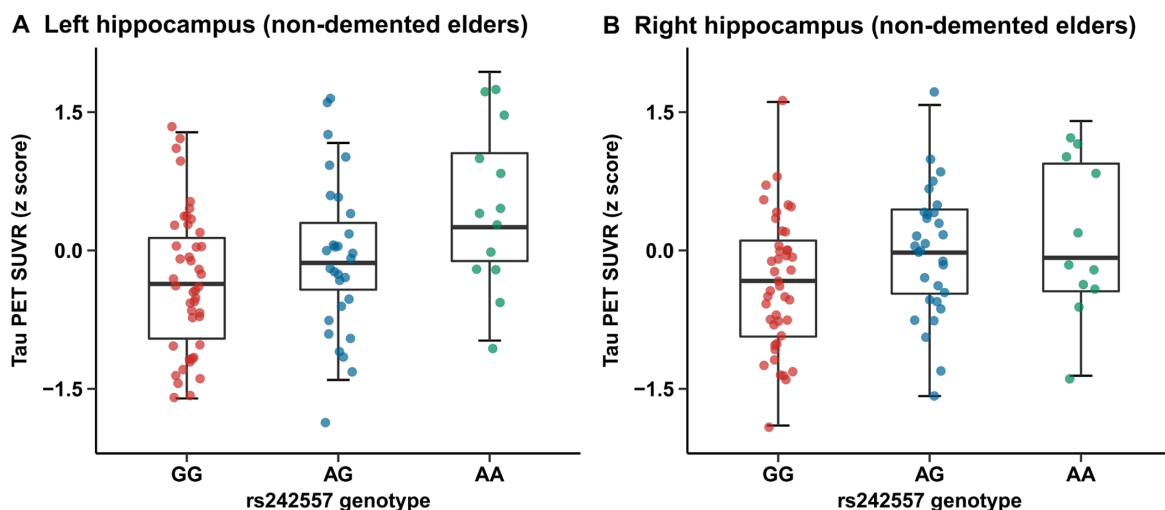

**Figure 1. Quantitative comparisons for adjusted correlations of hippocampus tau PET SUVR levels with rs242557 variant in the non-demented cohort.** (A) Left hippocampus tau PET SUVR for each subject in the non-demented elders is plotted separated by rs242557 genotype (GG, AG and AA; adjusted  $\beta = 0.111$ ,  $p = 0.001$ , Bonferroni corrected  $p = 0.035$ ). (B) Right hippocampus tau PET SUVR for each subject in the non-demented elders is plotted separated by rs242557 genotype (adjusted  $\beta = 0.103$ ,  $p = 0.001$ , Bonferroni corrected  $p = 0.031$ ).

categorized by diagnosis. Individuals with MCI did not present a significant correlation of *MAPT* rs242557 variant with pathological tau aggregates in any brain regions. It is speculated that the MCI group might consist of subjects whose cognition decline were caused by other neurodegenerative disorders. Longitudinal studies on large sample size are required for further investigation and verification. In addition, the subgroup analyses by A $\beta$  pathology described the consistent clinical features with the findings reported by Scholl et al., that older age and worse cognition performance were associated with elevated tau-PET <sup>18</sup>F-AV-1451 retention in the medial temporal region

[8]. Much effort is needed to further explore the underlying mechanisms. *APOE*  $\epsilon$ 4 is regarded as the most definite genetic factor for AD, and its carriers were found to distribute greater <sup>18</sup>F-AV-1451 retention in the medial/lateral temporal and parietal cortex than its non-carriers in AD [12]. Our current data identified that rs242557 was merely associated with the <sup>18</sup>F-AV-1451 binding capacity in the hippocampus of *APOE*  $\epsilon$ 4 non-carriers instead of the carriers. We therefore hypothesized that rs242557 risk variant might have an influence on tau aggregates independent of *APOE*  $\epsilon$ 4. Given the small sample size, this statistical association should be interpreted cautiously.

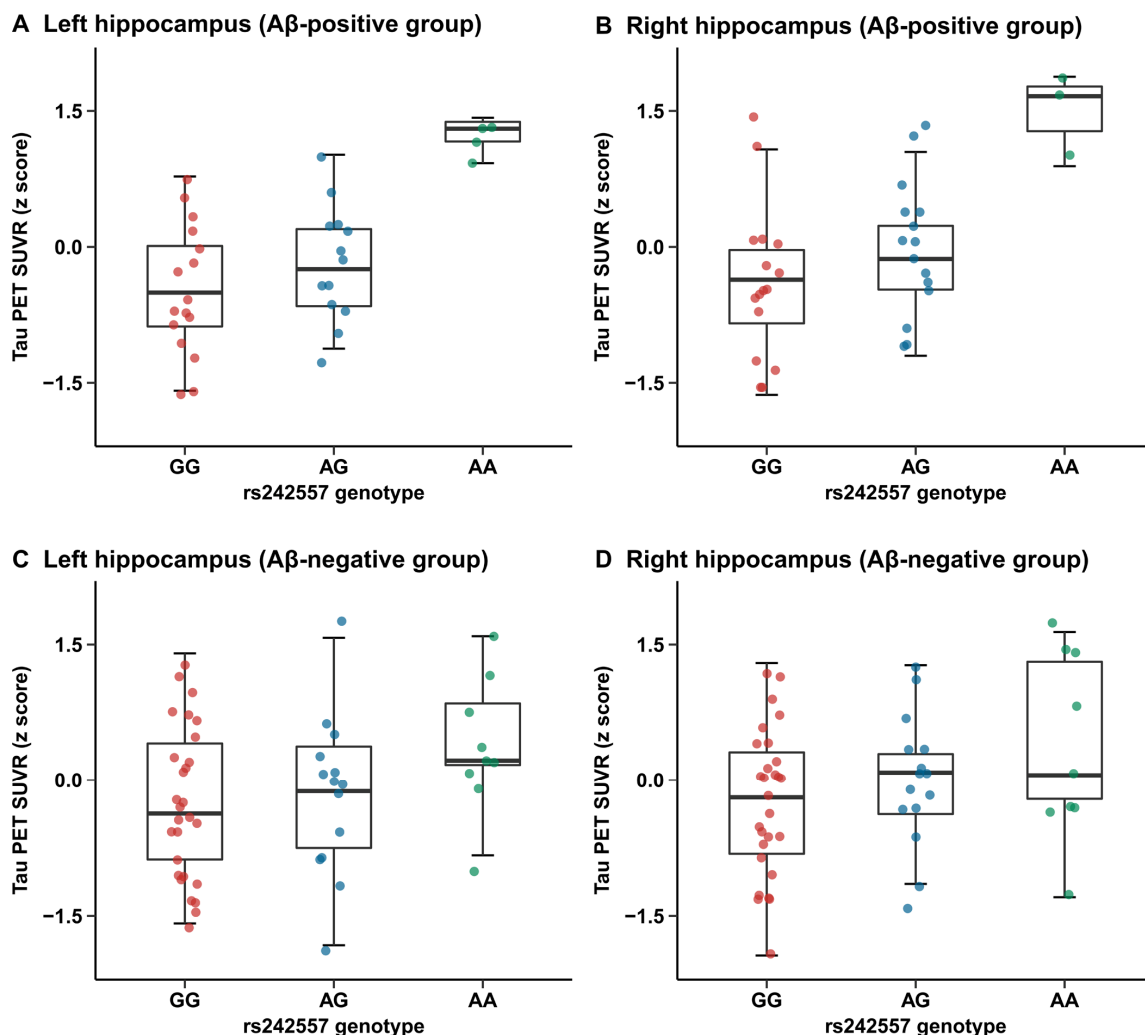

**Figure 2. Quantitative comparisons for adjusted correlations of hippocampus tau PET SUVR levels with rs242557 variant in the subgroups categorized by A $\beta$  pathology.** (A) Left hippocampus tau PET SUVR for each subject in the A $\beta$ -positive group is plotted separated by rs242557 genotype (adjusted  $\beta = 0.206$ ,  $p = 0.001$ , Bonferroni corrected  $p = 0.029$ ). (B) Right hippocampus tau PET SUVR for each subject in the A $\beta$ -positive group is plotted separated by rs242557 genotype (adjusted  $\beta = 0.198$ ,  $p = 0.001$ , Bonferroni corrected  $p = 0.035$ ). (C) Left hippocampus tau PET SUVR for each subject in the A $\beta$ -negative group is plotted separated by rs242557 genotype (adjusted  $\beta = 0.083$ ,  $p = 0.035$ , Bonferroni corrected  $p = 0.878$ ). (D) Right hippocampus tau PET SUVR for each subject in the A $\beta$ -negative group is plotted separated by rs242557 genotype (adjusted  $\beta = 0.075$ ,  $p = 0.037$ , Bonferroni corrected  $p = 0.930$ ).
